# Supplementary material for: Common protocol for validation of the QCOVID algorithm across the four UK nations
Source: PubMed Central journal article supplement (PMC9198386; doi:10.1136/bmjopen-2021-050994), 2022-06-14
Supplement: bmjopen-2021-050994.draft_revisions.pdf [file bmjopen-2021-050994.draft_revisions.pdf]

# BMJ Open

BMJ Open is committed to open peer review. As part of this commitment we make the peer review history of every article we publish publicly available.

When an article is published we post the peer reviewers' comments and the authors' responses online. We also post the versions of the paper that were used during peer review. These are the versions that the peer review comments apply to.

The versions of the paper that follow are the versions that were submitted during the peer review process. They are not the versions of record or the final published versions. They should not be cited or distributed as the published version of this manuscript.

BMJ Open is an open access journal and the full, final, typeset and author-corrected version of record of the manuscript is available on our site with no access controls, subscription charges or pay-per-view fees (<http://bmjopen.bmj.com>).

If you have any questions on BMJ Open's open peer review process please email [info.bmjopen@bmj.com](mailto:info.bmjopen@bmj.com)

# BMJ Open

## A common methodology for validation of the Qcovid algorithm across the four UK nations

|                               |                                                                                                                                                                                                                                                                                                                                                                                                                                                                                                                                                                                                                                                                                                                                                                                                                                                                                             |
|-------------------------------|---------------------------------------------------------------------------------------------------------------------------------------------------------------------------------------------------------------------------------------------------------------------------------------------------------------------------------------------------------------------------------------------------------------------------------------------------------------------------------------------------------------------------------------------------------------------------------------------------------------------------------------------------------------------------------------------------------------------------------------------------------------------------------------------------------------------------------------------------------------------------------------------|
| Journal:                      | <i>BMJ Open</i>                                                                                                                                                                                                                                                                                                                                                                                                                                                                                                                                                                                                                                                                                                                                                                                                                                                                             |
| Manuscript ID                 | bmjopen-2021-050994                                                                                                                                                                                                                                                                                                                                                                                                                                                                                                                                                                                                                                                                                                                                                                                                                                                                         |
| Article Type:                 | Protocol                                                                                                                                                                                                                                                                                                                                                                                                                                                                                                                                                                                                                                                                                                                                                                                                                                                                                    |
| Date Submitted by the Author: | 06-Mar-2021                                                                                                                                                                                                                                                                                                                                                                                                                                                                                                                                                                                                                                                                                                                                                                                                                                                                                 |
| Complete List of Authors:     | Kerr, Steven; The University of Edinburgh Usher Institute of Population Health Sciences and Informatics,<br>Robertson, Chris; University of Strathclyde, Department of Mathematics and Statistics<br>Nafilyan, Vahe; Office for National Statistics<br>Lyons, Ronan; University of Wales Swansea, Swansea Clinical School<br>Kee, Frank; Queen's University Belfast, UKCRC Centre of Excellence for Public Health (NI)<br>Cardwell, Christopher; Queen's University Belfast, School of Medicine, Dentistry and Biomedical Sciences<br>Coupland, Carol; University of Nottingham, Division of Primary Care<br>Lyons, Jane; Swansea University Medical School<br>Humberstone, Ben; Office for National Statistics<br>Hippisley-Cox, Julia; University of Oxford, Nuffield Department of Primary Care Sciences<br>Sheikh, Aziz; University of Edinburgh, Division of Community Health Sciences |
| Keywords:                     | COVID-19, Epidemiology < INFECTIOUS DISEASES, Public health < INFECTIOUS DISEASES                                                                                                                                                                                                                                                                                                                                                                                                                                                                                                                                                                                                                                                                                                                                                                                                           |
|                               |                                                                                                                                                                                                                                                                                                                                                                                                                                                                                                                                                                                                                                                                                                                                                                                                                                                                                             |

SCHOLARONE™  
Manuscripts

# A common methodology for validation of the QCOVID algorithm across the four UK nations

Steven Kerr, stevenkerr2@gmail.com (corresponding author) [1]

Chris Robertson [2,3]

Vahe Nafilyan [4]

Ronan A Lyons [5]

Frank Kee [6]

Chris Cardwell [6]

Carol Coupland [7]

Jane Lyons [5]

Ben Humberstone [4]

Julie Hippisley-Cox [8]

Aziz Sheikh [1]

[1] Usher Institute, The University of Edinburgh, NINE Edinburgh BioQuarter, Edinburgh, UK, EH16 4UX.

[2] University of Strathclyde, Glasgow, UK.

[3] Public Health Scotland, UK

[4] Office for National Statistics, UK.

[5] Population Data Science, Swansea University Medical School, Swansea, UK.

[6] Queen's University Belfast, Belfast, UK.

[7] University of Nottingham, Nottingham, UK.

[8] University of Oxford, Oxford, UK.

**Keywords:** Covid-19, Coronavirus, QCOVID, Epidemiology, Public Health.

**Word count:** 3,094

## ABSTRACT

### Introduction:

The QCOVID algorithm is a risk prediction tool for infection and subsequent hospitalisation/death due to SARS-Cov-2. At the time of writing, it is being used in important policymaking decisions by the UK and devolved governments for combatting the Covid-19 pandemic, including deliberations on shielding and vaccine prioritisation. There are four statistical validation exercises currently planned for the QCOVID algorithm, using data pertaining to England, Northern Ireland, Scotland and Wales respectively. This paper presents a common procedure for conducting and reporting on validation exercises for the QCOVID algorithm.

### Methods and Analysis:

We will use open, retrospective cohort studies to assess the performance of the QCOVID risk prediction tool in each of the four UK nations. Linked datasets comprising of primary and secondary care records, virological testing data and death registrations will be assembled in trusted research environments in England, Scotland, Northern Ireland and Wales. We will seek to have population level coverage as far as possible within each nation. The following performance metrics will be calculated by strata: Harrell's C, Brier score,  $R^2$  and Royston's D.

### Ethics and dissemination:

Approvals have been obtained from relevant ethics bodies in each UK nation. Findings will be made available to national policymakers, presented at conferences and published in peer reviewed journal

### Strengths and limitations of this study:

- We will use national level data within each UK nation
- There are potential issues with missing data and differences in the way data is recorded in each country.
- We will evaluate the performance of the algorithm according to several relevant metrics.

## INTRODUCTION:

The QCOVID algorithm [1] has been developed to help identify adults at high risk of being hospitalised or dying following infection with SARS-Cov-2. The algorithm takes as input a total of 40 variables including age, sex, ethnicity, Townsend deprivation score [2] and housing category, as well as clinical information including body mass index (BMI) and 33 variables related to medical conditions and treatments. It outputs the predicted probability that an individual will be infected with SARS-Cov-2 and then hospitalised, and the predicted probability that an individual will be infected with SARS-Cov-2 and then die, over a 90 day period. The algorithm was trained using information from the QResearch database [3], which as of April 2020 contained routinely collected data from 1205 General Practices across England, covering 10.5 million patients. The initial training dataset comprised of a cohort of 6.08 million individuals tracked from the 24 January 2020 to 30 April 2020, and was validated on a subset of 2.17 million individuals tracked from 1 May 2020 to 30 June 2020. The research protocol for the development of the QCOVID algorithm can be found in [4].

The QCOVID algorithm was commissioned by the Chief Medical Officer for England on behalf of the UK government. The algorithm is currently being used to inform UK and devolved government policy on combatting the SARS-Cov-2 pandemic, including guidance on social-distancing and shielding measures, as well vaccine prioritisation. [5] It is therefore of great importance to validate the predictions of the algorithm in sub-populations of the UK that were not in the initial training set, but will potentially be subject to those policies.

Four separate validation exercises for the QCOVID algorithm are planned – one for each of England, Northern Ireland, Scotland and Wales. In order to facilitate useful comparison of the results of the separate validation exercises, it is necessary to establish a consistent set of procedures. The purpose of this paper is to explicate a common methodology for the validation of the QCOVID algorithm across the four nations of the UK.

## METHODS AND ANALYSIS:

### Study design:

Open, retrospective cohort study designs will be employed, making use of routinely collected data from General Practices as well as linked datasets on hospital admissions, reverse-transcription polymerase chain reaction (RT-PCR) testing for Covid-19, and registered deaths. We will aim to have national coverage as far as is possible within each of the four nations of the UK.

### Data Sources:

Box 1 contains a brief summary of the main datasets that will be used in the validation exercise for each nation

#### Box 1: Main datasets to be used

**England:** Office for National Statistics (ONS) Public Health Linked Data Asset. This dataset is based on the 2011 Census in England covering 40.1 million people, linked at individual level using the NHS number to mortality records, Hospital Episode Statistics (HES) and the General Practice Extraction Service (GPES) data for pandemic planning and research. The data covers 80% of the population of England aged 19 and over.

**Northern Ireland:** National Health Application and Infrastructure Services (NHAIS) will be used for demographic information. The Patient Administration System (PAS) will be used for data on hospital admissions. Death data will be drawn from the Registrar General, and identified as Covid-19 related through the official Northern Ireland Statistics and Research Agency (NISRA) dashboard. The General Practice Information Platform (GPIP) will bring together GP records from practices across Northern Ireland into a single dataset for use in the validation. As this is not held in the Honest Broker Service, a separate request to its governance board is being made. The Electronic Prescribing Database (EPD) will be used to access information on prescriptions.

**Scotland:** EAVE II dataset [6]. Contains primary health care records for 5.4 million people covering 99% of the population of Scotland, linked with secondary care data from Scottish Morbidity Record (SMR), Covid-19 test results from Electronic Communication of Surveillance Scotland (ECOSS), and mortality data from National Records Scotland.

**Wales:** Secure Anonymised Information Linkage (SAIL system) [7]. This will utilise the Controlling Covid (ConCOV) platform linking records on 3.2 million people from the NHS population spine with hospital (Patient Episode Database for Wales), Welsh Longitudinal GP record (WLGP), Covid-19 test results from the Laboratory Information Management System (LIMS), and mortality and 2011 Census data from the Office for National Statistics (ONS) [8]

**Selection criteria:**

Any individual in the relevant linked dataset between the ages of 19 and 100 will be included.

Individuals who had an event (hospitalisation or death) in the first period (24 January 2020 – 30

April 2020) will be excluded from any analysis in the second period (1 May 2020 – 30 June 2020).

**Exposure and Outcomes:**

Table 1 and 2 list all exposure and outcomes variables respectively for the QCOVID algorithm, along with a description, variable type (e.g. integer, real, categorical) and possible values.

*Table 1: Exposure variables in QCOVID algorithm.*

| <b>Variable:</b>    | <b>Description/Question:</b>                                      | <b>Value:</b>                                                                                                                      |
|---------------------|-------------------------------------------------------------------|------------------------------------------------------------------------------------------------------------------------------------|
| <b>Demographic:</b> |                                                                   |                                                                                                                                    |
| age                 | Age in years                                                      | Integer: 19-100                                                                                                                    |
| sex                 | Biological sex at birth                                           | Categorical: female, male                                                                                                          |
| town                | Townsend Deprivation Score                                        | Real number                                                                                                                        |
| ethnicity           | Ethnicity                                                         | Categorical:<br>White, Indian, Pakistani,<br>Bangladeshi, Other Asian,<br>Caribbean, Black African,<br>Chinese, other ethnic group |
| homecat             | What is your housing category - care home or homeless or neither? | Categorical:<br>neither, care home,<br>homeless                                                                                    |

|                  |                                                  |                                                    |
|------------------|--------------------------------------------------|----------------------------------------------------|
| <b>Clinical:</b> |                                                  |                                                    |
| bmi              | Body Mass Index (kg/m <sup>2</sup> )             | Positive real number                               |
| chemocat         | Have you had chemotherapy in the last 12 months? | Categorical:<br>none, group A, group B,<br>group C |

|               |                                                                                                                             |                                                                                                                                                                                                          |
|---------------|-----------------------------------------------------------------------------------------------------------------------------|----------------------------------------------------------------------------------------------------------------------------------------------------------------------------------------------------------|
| learncat      | Do you have a learning disability or Down's Syndrome?                                                                       | Categorical:<br>learning disability, Down syndrome                                                                                                                                                       |
| renalcat      | Chronic Kidney Disease (CKD) stage                                                                                          | Categorical:<br>No serious kidney disease,<br>CKD stage 3,<br>CKD stage 4,<br>CKD stage 5 without dialysis or transplant,<br>CKD stage 5 with dialysis in last 12 months,<br>CKD stage 5 with transplant |
| diabetescat   | Do you have diabetes?                                                                                                       | Categorical:<br>none, type 1, type 2                                                                                                                                                                     |
| b2_82         | Have you been prescribed immunosuppressants four or more times in the previous 6 months?                                    | Categorical: yes, no                                                                                                                                                                                     |
| b2_leukolaba  | Have you been prescribed anti-leukotriene or long acting beta2-agonists (LABA) four or more times in the previous 6 months? | Categorical: yes, no                                                                                                                                                                                     |
| b2_prednisone | Have you been prescribed oral prednisolone containing preparations prescribed four or more times in the previous 6 months?  | Categorical: yes, no                                                                                                                                                                                     |
| b_AF          | Do you have atrial fibrillation?                                                                                            | Categorical: yes, no                                                                                                                                                                                     |
| b_CCF         | Do you have heart failure?                                                                                                  | Categorical: yes, no                                                                                                                                                                                     |
| b_asthma      | Do you have asthma?                                                                                                         | Categorical: yes, no                                                                                                                                                                                     |
| b_bloodcancer | Have you a cancer of the blood or bone marrow such as leukaemia, myelodysplastic syndromes,                                 | Categorical: yes, no                                                                                                                                                                                     |



|                  |                                                                                              |                      |
|------------------|----------------------------------------------------------------------------------------------|----------------------|
|                  | lymphoma or myeloma and are at any stage of treatment?                                       |                      |
| b_cerebralpalsay | Do you have cerebral palsy?                                                                  | Categorical: yes, no |
| b_chd            | Do you have coronary heart disease?                                                          | Categorical: yes, no |
| b_cirrhosis      | Do you have cirrhosis of the liver?                                                          | Categorical: yes, no |
| b_congenheart    | Do you have congenital heart disease or have you had surgery for it in the past?             | Categorical: yes, no |
| b_copd           | Do you have chronic obstructive pulmonary disease (COPD)?                                    | Categorical: yes, no |
| b_dementia       | Do you have dementia?                                                                        | Categorical: yes, no |
| b_epilepsy       | Do you have epilepsy?                                                                        | Categorical: yes, no |
| b_fracture4      | Have you had a prior fracture of hip, wrist, spine or humerus?                               | Categorical: yes, no |
| b_neurorare      | Do you have motor neurone disease, multiple sclerosis, myaesthesia, or Huntingtons's Chorea? | Categorical: yes, no |
| b_parkinsons     | Do you have Parkinson's disease?                                                             | Categorical: yes, no |
| b_pulmhyper      | Do you have pulmonary hypertension or pulmonary fibrosis?                                    | Categorical: yes, no |
| b_pulmrare       | Do you have cystic fibrosis or bronchiectasis or alveolitis?                                 | Categorical: yes, no |
| b_pvd            | Do you have peripheral vascular disease?                                                     | Categorical: yes, no |
| b_ra_sle         | Do you have rheumatoid arthritis or SLE?                                                     | Categorical: yes, no |
| b_respcancer     | Do you have lung or oral cancer?                                                             | Categorical: yes, no |
| b_semi           | Do you have severe mental illness?                                                           | Categorical: yes, no |

|                     |                                                                                                  |                      |
|---------------------|--------------------------------------------------------------------------------------------------|----------------------|
| b_sicklecelldisease | Do you have sickle cell disease or severe combined immune deficiency syndromes?                  | Categorical: yes, no |
| b_stroke            | Have you had a stroke or TIA?                                                                    | Categorical: yes, no |
| b_vte               | Have you had a thrombosis or pulmonary embolus?                                                  | Categorical: yes, no |
| p_marrow6           | Have you had a bone marrow or stem cell transplant in the last 6 months?                         | Categorical: yes, no |
| p_radio6            | Have you had radiotherapy in the last 6 months?                                                  | Categorical: yes, no |
| p_solidtransplant   | Have you had a solid organ transplant (lung, liver, stomach, pancreas, spleen, heart or thymus)? | Categorical: yes, no |

Table 2: Outcomes variables in QCOVID algorithm.

| Variable:                        | Description/Question:                                                                                                                     | Value:            |
|----------------------------------|-------------------------------------------------------------------------------------------------------------------------------------------|-------------------|
| Time to Covid-19 hospitalisation | Time to hospitalisation with RT-PCR confirmed Covid-19 infection in the cohort period in days.                                            | Real number: 0-91 |
| Time to Covid-19 death           | Time to death with Covid-19 confirmed or suspected on their death certificate, or confirmed by RT-PCR test, in the cohort period in days. | Real number: 0-91 |

Whenever available, all variables will be taken as the most recent recorded value in the relevant dataset at the date of entry into the cohort. The Townsend Deprivation Score (TDS) will be determined by matching available residential location information with output area and the

1  
2 corresponding TDS from the 2011 UK census [9]. Categories for the variable chemocat will be  
3 determined using the lookup table in the supplemental materials.  
4  
5  
6

### 7 **Data cleaning:**

8 The following procedures will be used for data cleaning:  
9

- 10 • **diabetes\_cat:** If the most recent entry has both type 1 and types 2 recorded, diabetes\_cat  
11 will be set to type 2.  
12
- 13 • **BMI:** The most recently recorded patient BMI within the last 5 years. If the most recently  
14 recorded BMI is from more than 5 years ago at the search date, bmi will be set to missing  
15 value.  
16
- 17 • **learncat:** If a patient is recorded as having both learning disability and Down's syndrome,  
18 learncat will be set to Down's syndrome.  
19  
20  
21  
22  
23

### 24 **Missing data:**

25 For comorbidities and medication use and treatments, missing values will be taken to mean absence  
26 of that factor. Missing values for ethnicity will be set to "White". For any other missing values, a  
27 single imputation will be considered. The following methods may be considered for use in the  
28 imputation: predictive mean matching, least squares, logistic and multinomial models, imputation  
29 by chained equations.  
30  
31  
32  
33  
34  
35  
36  
37  
38  
39  
40  
41

### 42 **Statistical Analysis:**

43 Each validation exercise will report a table of cohort characteristics, following Table 2 in [1]. The  
44 main performance metrics that will be calculated are  $R^2$  [9], Harrell's C, Royston's D [10] and the  
45 Brier score. Different stratifications for these statistics will be considered, including by age, sex and  
46 time period. 95% confidence intervals will be reported for  $R^2$ , Harrell's C and Royston's D. Graphs  
47 of observed and predicted probability of hospital admission and death by vigintile for stratified  
48 subgroups will be reported, following [1]. Other analyses/reporting measures will also be  
49 considered.  
50  
51  
52  
53  
54  
55  
56

### 57 **Sample Size:**

58 A preliminary sample size calculation can be done using figures from the original paper [1]. Using  
59 the estimated standard deviation of Harrell's C for females in the first time period and assuming  
60

1  
2 Harrell's C is asymptotically normally distributed implies that a sample size of approximately 5,714  
3 would be sufficient to detect a true value for Harrell's C that is greater than or equal to 0.8 with  
4 80% power. Repeating this calculation for other population subgroups and time periods yields  
5 results of a similar magnitude. The samples sizes in the planned studies will be on the order of  
6 hundreds of thousands or millions.  
7  
8  
9

### 10 11 12 **Ethics, reporting and dissemination**

13  
14 The ethics approval for the development and validation of QCOVID in England was granted by the  
15 East Midlands-Derby Research Ethics Committee [reference 18/EM/0400]. For Scotland, approvals  
16 have been obtained by the National Research Ethics Service Committee (REC), South East Scotland  
17 02 (REC number: 12/SS/0201) and the Public Benefit and Privacy Panel for Health and Social Care  
18 (reference number: 1920-0279). The data to be used in this study for Wales are available in the  
19 SAIL Databank at Swansea University, Swansea, UK. All proposals to use SAIL data are subject to  
20 review by an independent Information Governance Review Panel (IGRP). Before any data can be  
21 accessed, approval must be given by the IGRP. The IGRP gives careful consideration to each  
22 project to ensure proper and appropriate use of SAIL data. When access has been approved, it is  
23 gained through a privacy-protecting safe haven and remote access system referred to as the SAIL  
24 Gateway. SAIL has established an application process to be followed by anyone who would like to  
25 access data via SAIL.[7] Findings will be presented at conferences, published in peer-reviewed  
26 journals and to the funders and government COVID-19 advisory bodies as appropriate.  
27

28 Strengthening the Reporting of Observational Studies in Epidemiology (STROBE) and Reporting  
29 of studies Conducted using Observational Routinely-collected Data (RECORD) (via the COVID-19  
30 extension) checklists will guide our study findings reporting. The Northern Ireland validation study  
31 proposal is under review by the NITRE for HSC data accessed via Northern Ireland Honest Broker  
32 Service; an Ethics application has been submitted through IRAS.  
33  
34  
35

### 36 37 **Author's Contributions:**

38 AS conceived this protocol. CR, VH, FK, TC, JHC, BH, CC, RAL and JL provided country  
39 specific information about available data and analysis plans. SK wrote drafts of this protocol. All  
40 authors gave final approval of the version to be published.  
41  
42  
43  
44  
45

### 46 47 **Acknowledgments**

48 This work will use data provided by patients and collected by a number of organisations. We would  
49 like to acknowledge all patients who shared their information as well as all data providers who  
50 make anonymised data available for research. In particular, Public Health Scotland, Public Health  
51  
52  
53  
54  
55  
56  
57  
58  
59  
60

1  
2 Wales, Public Health England, the NHS, the SAIL databank, and the Office for National Statistics.  
3  
4

### 5 **Funding:**

6  
7 The validation in England will be funded by a grant from the National Institute for Health Research  
8 following a commission by the Chief Medical Officer for England. In Scotland, EAVE II is funded  
9 by the Medical Research Council [MR/R008345/1] and supported by the Scottish Government. In  
10 Wales, ConCOV is supported by the Medical Research Council [MR/V028367/1].  
11  
12  
13  
14

### 15 **Competing interests:**

16  
17 AS reports grants from NIHR, grants from MRC, and grants from HRR UK, during the conduct of  
18 the study. JL and RAL report grants from UKRI Medical Research Council, during the conduct of  
19 the study. JHC reports grants from John Fell Oxford University Press Research Fund, grants from  
20 Cancer Research UK (CR-UK) grant number C5255/A18085, through the Cancer Research UK  
21 Oxford Centre, grants from the Oxford Wellcome Institutional Strategic Support Fund  
22 (204826/Z/16/Z), grants from NIHR, during the conduct of the study; personal fees and other from  
23 ClinRisk Ltd, outside the submitted work; and JHC is an unpaid director of QResearch, a not-for-  
24 profit organisation which is a partnership between the University of Oxford and EMIS Health who  
25 supply the QResearch database used for this work. Carol Coupland reports personal fees from  
26 ClinRisk Ltd, outside the submitted work. JHC, AS, and Carol Coupland were members of the  
27 research team involved in the development of the QCOVID risk prediction algorithm. All other  
28 authors report no conflict of interest.  
29  
30  
31  
32  
33  
34  
35  
36  
37  
38  
39

### 40 **Patient and Public Involvement:**

41 There are no plans for Patient and Public Involvement in this research.  
42  
43  
44

### 45 **References:**

- 46 1. Clift AK, Coupland CAC, Keogh RH, Diaz-Ordaz K, Williamson E, Harrison EM, Hayward A,  
47 Hemingway H, Horby P, Mehta N, Bengler J, Khunti K, Spiegelhalter D, Sheikh A, Valabhji J,  
48 Lyons RA, Robson J, Semple MG, Kee F, Johnson P, Jebb S, Williams T, Hippisley-Cox J. Living  
49 risk prediction algorithm (QCOVID) for risk of hospital admission and mortality from coronavirus  
50 19 in adults: national derivation and validation cohort study. *BMJ*. 2020 Oct 20;371:m3731. doi:  
51 10.1136/bmj.m3731. PMID: 33082154; PMCID: PMC7574532.
- 52 2. Townsend, P., Phillimore, P. and Beattie, A. (1988) *Health and Deprivation: Inequality and the*  
53 *North*. Routledge, London. doi: 10.7748/ns.2.17.34.s66. PMID: 27415096.
- 54 3. Qresearch, <https://www.qresearch.org/>  
55  
56  
57  
58  
59  
60

- 1  
2  
3  
4  
5  
6  
7  
8  
9  
10  
11  
12  
13  
14  
15  
16  
17  
18  
19  
20  
21  
22  
23  
24  
25  
26  
27  
28  
29  
30  
31  
32  
33  
34  
35  
36  
37  
38  
39  
40  
41  
42  
43  
44  
45  
46  
47  
48  
49  
50  
51  
52  
53  
54  
55  
56  
57  
58  
59  
60
4. Hippisley-Cox J, Clift AK, Coupland CAC, et al. Protocol for the development and evaluation of a tool for predicting risk of short-term adverse outcomes due to COVID-19 in the general UK population. *MedRxiv* 2020:2020.06.28.20141986-2020.06.28
  5. <https://www.gov.uk/government/news/new-technology-to-help-identify-those-at-high-risk-from-covid-19>
  6. EAVE II, The Usher Institute, <https://www.ed.ac.uk/usher/eave-ii>
  7. The Secure Anonymised Information Linkage (SAIL) databank. Available at: <https://saildatabank.com>
  8. Lyons J, Akbari A, Torabi F, Davies G, North L, Griffiths R, Bailey R, Hollinghurst J, Fry R, Turner S, Thompson D, Rafferty J, Mizen A, Orton C, Ellwood-Thompson S, Au-Yeung L, Cross L, Gravenor M, Brophy S, Lucini B, John A, Szakmany T, Davies J, Davies C, Williams C, Emmerson C, Cottrell S, Connor T, Taylor C, Pugh R, Diggle PJ, John G, Scourfield S, Hunt J, Cunningham AM, Helliwell K, Lyons RA. (2020) Understanding and responding to COVID19 in Wales: protocol for a privacy protecting data platform for enhanced epidemiology and evaluation of interventions. *BMJ Open* 2020;10:e043010. doi:10.1136/bmjopen-2020-043010
  9. 2011 UK Census, Townsend Deprivation Scores, <https://www.statistics.digitalresources.jisc.ac.uk/dataset/2011-uk-townsend-deprivation-scores>
  10. Royston P, Sauerbrei W. A new measure of prognostic separation in survival data. *Stat Med*. 2004 Mar 15;23(5):723-48. doi: 10.1002/sim.1621. PMID: 14981672.



| Group | Drug    | Final classification | map |
|-------|---------|----------------------|-----|
| 1     | Group A | 1.8.2                |     |
| 2     | Group B | 3.8.4                |     |
| 3     | Group C | 5                    |     |
| 4     |         |                      |     |
| 5     |         |                      |     |
| 6     |         |                      |     |
| 7     |         |                      |     |
| 8     |         |                      |     |
| 9     |         |                      |     |
| 10    |         |                      |     |
| 11    |         |                      |     |
| 12    |         |                      |     |
| 13    |         |                      |     |
| 14    |         |                      |     |
| 15    |         |                      |     |
| 16    |         |                      |     |
| 17    |         |                      |     |
| 18    |         |                      |     |
| 19    |         |                      |     |
| 20    |         |                      |     |
| 21    |         |                      |     |
| 22    |         |                      |     |
| 23    |         |                      |     |
| 24    |         |                      |     |
| 25    |         |                      |     |
| 26    |         |                      |     |
| 27    |         |                      |     |
| 28    |         |                      |     |
| 29    |         |                      |     |
| 30    |         |                      |     |
| 31    |         |                      |     |
| 32    |         |                      |     |
| 33    |         |                      |     |
| 34    |         |                      |     |
| 35    |         |                      |     |
| 36    |         |                      |     |
| 37    |         |                      |     |
| 38    |         |                      |     |
| 39    |         |                      |     |
| 40    |         |                      |     |
| 41    |         |                      |     |
| 42    |         |                      |     |
| 43    |         |                      |     |
| 44    |         |                      |     |
| 45    |         |                      |     |
| 46    |         |                      |     |
| 47    |         |                      |     |
| 48    |         |                      |     |
| 49    |         |                      |     |
| 50    |         |                      |     |
| 51    |         |                      |     |
| 52    |         |                      |     |
| 53    |         |                      |     |
| 54    |         |                      |     |
| 55    |         |                      |     |
| 56    |         |                      |     |
| 57    |         |                      |     |
| 58    |         |                      |     |
| 59    |         |                      |     |
| 60    |         |                      |     |

# BMJ Open

## A common methodology for validation of the Qcovid algorithm across the four UK nations

|                                 |                                                                                                                                                                                                                                                                                                                                                                                                                                                                                                                                                                                                                                                                                                                                                                                                                                                                                             |
|---------------------------------|---------------------------------------------------------------------------------------------------------------------------------------------------------------------------------------------------------------------------------------------------------------------------------------------------------------------------------------------------------------------------------------------------------------------------------------------------------------------------------------------------------------------------------------------------------------------------------------------------------------------------------------------------------------------------------------------------------------------------------------------------------------------------------------------------------------------------------------------------------------------------------------------|
| Journal:                        | <i>BMJ Open</i>                                                                                                                                                                                                                                                                                                                                                                                                                                                                                                                                                                                                                                                                                                                                                                                                                                                                             |
| Manuscript ID                   | bmjopen-2021-050994.R1                                                                                                                                                                                                                                                                                                                                                                                                                                                                                                                                                                                                                                                                                                                                                                                                                                                                      |
| Article Type:                   | Protocol                                                                                                                                                                                                                                                                                                                                                                                                                                                                                                                                                                                                                                                                                                                                                                                                                                                                                    |
| Date Submitted by the Author:   | 07-Dec-2021                                                                                                                                                                                                                                                                                                                                                                                                                                                                                                                                                                                                                                                                                                                                                                                                                                                                                 |
| Complete List of Authors:       | Kerr, Steven; The University of Edinburgh Usher Institute of Population Health Sciences and Informatics,<br>Robertson, Chris; University of Strathclyde, Department of Mathematics and Statistics<br>Nafilyan, Vahe; Office for National Statistics<br>Lyons, Ronan; University of Wales Swansea, Swansea Clinical School<br>Kee, Frank; Queen's University Belfast, UKCRC Centre of Excellence for Public Health (NI)<br>Cardwell, Christopher; Queen's University Belfast, School of Medicine, Dentistry and Biomedical Sciences<br>Coupland, Carol; University of Nottingham, Division of Primary Care<br>Lyons, Jane; Swansea University Medical School<br>Humberstone, Ben; Office for National Statistics<br>Hippisley-Cox, Julia; University of Oxford, Nuffield Department of Primary Care Sciences<br>Sheikh, Aziz; University of Edinburgh, Division of Community Health Sciences |
| <b>Primary Subject Heading</b>: | Epidemiology                                                                                                                                                                                                                                                                                                                                                                                                                                                                                                                                                                                                                                                                                                                                                                                                                                                                                |
| Secondary Subject Heading:      | Infectious diseases, Respiratory medicine                                                                                                                                                                                                                                                                                                                                                                                                                                                                                                                                                                                                                                                                                                                                                                                                                                                   |
| Keywords:                       | COVID-19, Epidemiology < INFECTIOUS DISEASES, Public health < INFECTIOUS DISEASES                                                                                                                                                                                                                                                                                                                                                                                                                                                                                                                                                                                                                                                                                                                                                                                                           |
|                                 |                                                                                                                                                                                                                                                                                                                                                                                                                                                                                                                                                                                                                                                                                                                                                                                                                                                                                             |

SCHOLARONE™  
Manuscripts



# A common methodology for validation of the QCOVID algorithm across the four UK nations

Steven Kerr, stevenkerr2@gmail.com (corresponding author) [1]

Chris Robertson [2,3]

Vahe Nafilyan [4]

Ronan A Lyons [5]

Frank Kee [6]

Chris Cardwell [6]

Carol Coupland [7]

Jane Lyons [5]

Ben Humberstone [4]

Julie Hippisley-Cox [8]

Aziz Sheikh [1]

[1] Usher Institute, The University of Edinburgh, NINE Edinburgh BioQuarter, Edinburgh, UK, EH16 4UX.

[2] University of Strathclyde, Glasgow, UK.

[3] Public Health Scotland, UK

[4] Office for National Statistics, UK.

[5] Population Data Science, Swansea University Medical School, Swansea, UK.

[6] Queen's University Belfast, Belfast, UK.

[7] University of Nottingham, Nottingham, UK.

[8] University of Oxford, Oxford, UK.

**Keywords:** Covid-19, Coronavirus, QCOVID, Epidemiology, Public Health.

**Word count:** 3,148

## ABSTRACT

### Introduction:

The QCOVID algorithm is a risk prediction tool for infection and subsequent hospitalisation/death due to SARS-Cov-2. At the time of writing, it is being used in important policymaking decisions by the UK and devolved governments for combatting the Covid-19 pandemic, including deliberations on shielding and vaccine prioritisation. There are four statistical validation exercises currently planned for the QCOVID algorithm, using data pertaining to England, Northern Ireland, Scotland and Wales respectively. This paper presents a common procedure for conducting and reporting on validation exercises for the QCOVID algorithm.

### Methods and Analysis:

We will use open, retrospective cohort studies to assess the performance of the QCOVID risk prediction tool in each of the four UK nations. Linked datasets comprising of primary and secondary care records, virological testing data and death registrations will be assembled in trusted research environments in England, Scotland, Northern Ireland and Wales. We will seek to have population level coverage as far as possible within each nation. The following performance metrics will be calculated by strata: Harrell's C, Brier score,  $R^2$  and Royston's D.

### Ethics and dissemination:

Approvals have been obtained from relevant ethics bodies in each UK nation. Findings will be made available to national policymakers, presented at conferences and published in peer reviewed journal

### Strengths and limitations of this study:

- We will use national level data within each UK nation
- There are potential issues with missing data and differences in the way data is recorded in each country.
- We will evaluate the performance of the algorithm according to several relevant metrics.

## INTRODUCTION:

The QCOVID algorithm [1] has been developed to help identify adults at high risk of being hospitalised or dying following infection with SARS-Cov-2 (Severe acute respiratory syndrome coronavirus 2). The algorithm takes as input a total of 40 variables including age, sex, ethnicity, Townsend deprivation score [2] and housing category, as well as clinical information including body mass index (BMI) and 33 variables related to medical conditions and treatments. It outputs the predicted probability that an individual will be infected with SARS-Cov-2 and then hospitalised, and the predicted probability that an individual will be infected with SARS-Cov-2 and then die, over a 90 day period. The algorithm was trained using information from the QResearch database [3], which as of April 2020 contained routinely collected data from 1205 General Practices across England, covering 10.5 million patients. The initial training dataset comprised of a cohort of 6.08 million individuals tracked from the 24 January 2020 to 30 April 2020, and was validated on a subset of 2.17 million individuals tracked from 1 May 2020 to 30 June 2020. The research protocol for the development of the QCOVID algorithm can be found in [4].

The QCOVID algorithm was commissioned by the Chief Medical Officer for England on behalf of the UK government. The algorithm has been used to inform UK and devolved government policy on combatting the SARS-Cov-2 pandemic, including guidance on social-distancing and shielding measures, as well vaccine prioritisation. [5] It is therefore of great importance to validate the predictions of the algorithm in sub-populations of the UK that were not in the initial training set, but will potentially be subject to those policies.

At the time of writing, there are validation exercises planned in Scotland, Northern Ireland and Wales, and a validation exercise underway in England. Validation work has been expedited in order to support national decision making. In order to facilitate useful comparison of the results of the separate validation exercises, it is necessary to establish a consistent set of procedures. The purpose of this paper is to explicate a common methodology for the validation of the QCOVID algorithm across the four nations of the UK.

## METHODS AND ANALYSIS:

### Study design:

1  
2 Open, retrospective cohort study designs will be employed, making use of routinely collected data  
3 from General Practices for clinical and demographic information, as well as linked datasets on  
4 hospital admissions, reverse-transcription polymerase chain reaction (RT-PCR) testing for Covid-  
5 19, and registered deaths. We will aim to have national coverage as far as is possible within each of  
6 the four nations of the UK.  
7  
8  
9

## 10 11 12 **Data Sources:**

13  
14 Box 1 contains a brief summary of the main datasets that will be used in the validation exercise for  
15 each nation  
16

### 17 **Box 1: Main datasets to be used**

18  
19  
20  
21 **England:** Office for National Statistics (ONS) Public Health Linked Data Asset. This dataset is  
22 based on the 2011 Census in England covering 40.1 million people, linked at individual level  
23 using the NHS number to mortality records, Hospital Episode Statistics (HES) and the General  
24 Practice Extraction Service (GPES) data for pandemic planning and research. The data covers  
25 80% of the population of England aged 19 and over.  
26  
27

28  
29  
30 **Northern Ireland:** National Health Application and Infrastructure Services (NHAIS) will be used  
31 for demographic information. The Patient Administration System (PAS) will be used for data on  
32 hospital admissions. Death data will be drawn from the Registrar General, and identified as  
33 Covid-19 related through the official Northern Ireland Statistics and Research Agency (NISRA)  
34 dashboard. The General Practice Information Platform (GPIP) will bring together GP records  
35 from practices across Northern Ireland into a single dataset for use in the validation. As this is not  
36 held in the Honest Broker Service, a separate request to its governance board is being made. The  
37 Electronic Prescribing Database (EPD) will be used to access information on prescriptions.  
38  
39

40  
41  
42 **Scotland:** EAVE II dataset [6]. Contains primary health care records for 5.4 million people covering  
43 99% of the population of Scotland, linked with secondary care data from Scottish Morbidity  
44 Record (SMR), Covid-19 test results from Electronic Communication of Surveillance Scotland  
45 (ECOSS), and mortality data from National Records Scotland.  
46  
47

48  
49  
50  
51 **Wales:** Secure Anonymised Information Linkage (SAIL system) [7]. This will utilise the Controlling  
52 Covid (ConCOV) platform linking records on 3.2 million people from the NHS population spine  
53 with hospital (Patient Episode Database for Wales), Welsh Longitudinal GP record (WLGP),  
54 Covid-19 test results from the Laboratory Information Management System (LIMS), and  
55 mortality and 2011 Census data from the Office for National Statistics (ONS) [8]  
56  
57  
58  
59  
60

**Selection criteria:**

Any individual in the relevant linked dataset between the ages of 19 and 100 will be included.

Individuals who had an event (hospitalisation or death) in the first period (24 January 2020 – 30

April 2020) will be excluded from any analysis in the second period (1 May 2020 – 30 June 2020).

**Exposure and Outcomes:**

Table 1 and 2 list all exposure and outcomes variables respectively for the QCOVID algorithm, along with a description, variable type (e.g. integer, real, categorical) and possible values.

*Table 1: Exposure variables in QCOVID algorithm.*

| <b>Variable:</b>    | <b>Description/Question:</b>                                      | <b>Value:</b>                                                                                                                      |
|---------------------|-------------------------------------------------------------------|------------------------------------------------------------------------------------------------------------------------------------|
| <b>Demographic:</b> |                                                                   |                                                                                                                                    |
| age                 | Age in years                                                      | Integer: 19-100                                                                                                                    |
| sex                 | Biological sex at birth                                           | Categorical: female, male                                                                                                          |
| town                | Townsend Deprivation Score                                        | Real number                                                                                                                        |
| ethnicity           | Ethnicity                                                         | Categorical:<br>White, Indian, Pakistani,<br>Bangladeshi, Other Asian,<br>Caribbean, Black African,<br>Chinese, other ethnic group |
| homecat             | What is your housing category - care home or homeless or neither? | Categorical:<br>neither, care home,<br>homeless                                                                                    |

|                  |                                                  |                                                    |
|------------------|--------------------------------------------------|----------------------------------------------------|
| <b>Clinical:</b> |                                                  |                                                    |
| bmi              | Body Mass Index (kg/m <sup>2</sup> )             | Positive real number                               |
| chemocat         | Have you had chemotherapy in the last 12 months? | Categorical:<br>none, group A, group B,<br>group C |

|               |                                                                                                                             |                                                                                                                                                                                                          |
|---------------|-----------------------------------------------------------------------------------------------------------------------------|----------------------------------------------------------------------------------------------------------------------------------------------------------------------------------------------------------|
| learncat      | Do you have a learning disability or Down's Syndrome?                                                                       | Categorical:<br>learning disability, Down syndrome                                                                                                                                                       |
| renalcat      | Chronic Kidney Disease (CKD) stage                                                                                          | Categorical:<br>No serious kidney disease,<br>CKD stage 3,<br>CKD stage 4,<br>CKD stage 5 without dialysis or transplant,<br>CKD stage 5 with dialysis in last 12 months,<br>CKD stage 5 with transplant |
| diabetescat   | Do you have diabetes?                                                                                                       | Categorical:<br>none, type 1, type 2                                                                                                                                                                     |
| b2_82         | Have you been prescribed immunosuppressants four or more times in the previous 6 months?                                    | Categorical: yes, no                                                                                                                                                                                     |
| b2_leukolaba  | Have you been prescribed anti-leukotriene or long acting beta2-agonists (LABA) four or more times in the previous 6 months? | Categorical: yes, no                                                                                                                                                                                     |
| b2_prednisone | Have you been prescribed oral prednisolone containing preparations prescribed four or more times in the previous 6 months?  | Categorical: yes, no                                                                                                                                                                                     |
| b_AF          | Do you have atrial fibrillation?                                                                                            | Categorical: yes, no                                                                                                                                                                                     |
| b_CCF         | Do you have heart failure?                                                                                                  | Categorical: yes, no                                                                                                                                                                                     |
| b_asthma      | Do you have asthma?                                                                                                         | Categorical: yes, no                                                                                                                                                                                     |
| b_bloodcancer | Have you a cancer of the blood or bone marrow such as leukaemia, myelodysplastic syndromes,                                 | Categorical: yes, no                                                                                                                                                                                     |

|                  |                                                                                             |                      |
|------------------|---------------------------------------------------------------------------------------------|----------------------|
|                  | lymphoma or myeloma and are at any stage of treatment?                                      |                      |
| b_cerebralpalsay | Do you have cerebral palsy?                                                                 | Categorical: yes, no |
| b_chd            | Do you have coronary heart disease?                                                         | Categorical: yes, no |
| b_cirrhosis      | Do you have cirrhosis of the liver?                                                         | Categorical: yes, no |
| b_congenheart    | Do you have congenital heart disease or have you had surgery for it in the past?            | Categorical: yes, no |
| b_copd           | Do you have chronic obstructive pulmonary disease (COPD)?                                   | Categorical: yes, no |
| b_dementia       | Do you have dementia?                                                                       | Categorical: yes, no |
| b_epilepsy       | Do you have epilepsy?                                                                       | Categorical: yes, no |
| b_fracture4      | Have you had a prior fracture of hip, wrist, spine or humerus?                              | Categorical: yes, no |
| b_neurorare      | Do you have motor neurone disease, multiple sclerosis, myasthenia, or Huntingtons's Chorea? | Categorical: yes, no |
| b_parkinsons     | Do you have Parkinson's disease?                                                            | Categorical: yes, no |
| b_pulmhyper      | Do you have pulmonary hypertension or pulmonary fibrosis?                                   | Categorical: yes, no |
| b_pulmrare       | Do you have cystic fibrosis or bronchiectasis or alveolitis?                                | Categorical: yes, no |
| b_pvd            | Do you have peripheral vascular disease?                                                    | Categorical: yes, no |
| b_ra_sle         | Do you have rheumatoid arthritis or SLE?                                                    | Categorical: yes, no |
| b_respcancer     | Do you have lung or oral cancer?                                                            | Categorical: yes, no |
| b_semi           | Do you have severe mental illness?                                                          | Categorical: yes, no |

|                     |                                                                                                  |                      |
|---------------------|--------------------------------------------------------------------------------------------------|----------------------|
| b_sicklecelldisease | Do you have sickle cell disease or severe combined immune deficiency syndromes?                  | Categorical: yes, no |
| b_stroke            | Have you had a stroke or TIA?                                                                    | Categorical: yes, no |
| b_vte               | Have you had a thrombosis or pulmonary embolus?                                                  | Categorical: yes, no |
| p_marrow6           | Have you had a bone marrow or stem cell transplant in the last 6 months?                         | Categorical: yes, no |
| p_radio6            | Have you had radiotherapy in the last 6 months?                                                  | Categorical: yes, no |
| p_solidtransplant   | Have you had a solid organ transplant (lung, liver, stomach, pancreas, spleen, heart or thymus)? | Categorical: yes, no |

Table 2: Outcomes variables in QCOVID algorithm.

| Variable:                        | Description/Question:                                                                                                                     | Value:            |
|----------------------------------|-------------------------------------------------------------------------------------------------------------------------------------------|-------------------|
| Time to Covid-19 hospitalisation | Time to hospitalisation with RT-PCR confirmed Covid-19 infection in the cohort period in days.                                            | Real number: 0-91 |
| Time to Covid-19 death           | Time to death with Covid-19 confirmed or suspected on their death certificate, or confirmed by RT-PCR test, in the cohort period in days. | Real number: 0-91 |

Whenever available, all variables will be taken as the most recent recorded value in the relevant dataset at the date of entry into the cohort. The Townsend Deprivation Score (TDS) will be determined by matching available residential location information with output area and the



1  
2 corresponding TDS from the 2011 UK census [9]. Categories for the variable chemocat will be  
3 determined using the lookup table in the supplemental materials.  
4  
5

### 6 7 **Data cleaning:**

8 The following procedures will be used for data cleaning:  
9

- 10 • **diabetes\_cat:** If the most recent entry has both type 1 and types 2 recorded, diabetes\_cat  
11 will be set to type 2.  
12
- 13 • **BMI:** The most recently recorded patient BMI within the last 5 years. If the most recently  
14 recorded BMI is from more than 5 years ago at the search date, BMI will be set to missing  
15 value. Implausible values for BMI (<12 or >70) will be set to missing value.  
16  
17
- 18 • **learncat:** If a patient is recorded has having both learning disability and Down's syndrome,  
19 learncat will be set to Down's syndrome.  
20  
21  
22  
23

### 24 25 **Missing data:**

26 For comorbidities and medication use and treatments, missing values will be taken to mean absence  
27 of that factor. Modal substitution will be considered for missing values for ethnicity. For any other  
28 missing values of predictor variables, a single imputation will be considered. Outcome variables  
29 will not be imputed. The following methods may be considered for use in the imputation: predictive  
30 mean matching, least squares, logistic and multinomial models, imputation by chained equations.  
31  
32  
33  
34  
35  
36  
37  
38  
39  
40  
41

### 42 43 **Statistical Analysis:**

44 Each validation exercise will report a table of cohort characteristics, following Table 2 in [1]. The  
45 main performance metrics that will be calculated are  $R^2$  [9], Harrell's C, Royston's D [10] and the  
46 Brier score. Different stratifications for these statistics will be considered, including by age, sex and  
47 time period. 95% confidence intervals will be reported for  $R^2$ , Harrell's C and Royston's D. Graphs  
48 of observed and predicted probability of hospital admission and death by vigintile for stratified  
49 subgroups will be reported, following [1].  
50  
51  
52  
53  
54

### 55 56 **Sample Size:**

57 A preliminary sample size calculation can be done using figures from the original paper [1]. Using  
58 the estimated standard deviation of Harrell's C for females in the first time period and assuming  
59 Harrell's C is asymptotically normally distributed implies that a sample size of approximately 5,714  
60

1  
2 would be sufficient to detect a true value for Harrell's C that is greater than or equal to 0.8 with  
3 80% power. Repeating this calculation for other population subgroups and time periods yields  
4 results of a similar magnitude. The samples sizes in the planned studies will be on the order of  
5 hundreds of thousands or millions.  
6  
7  
8  
9

### 10 **Ethics, reporting and dissemination**

11 The ethics approval for the development and validation of QCOVID in England was granted by the  
12 East Midlands-Derby Research Ethics Committee [reference 18/EM/0400]. For Scotland, approvals  
13 have been obtained by the National Research Ethics Service Committee (REC), South East Scotland  
14 02 (REC number: 12/SS/0201) and the Public Benefit and Privacy Panel for Health and Social Care  
15 (reference number: 1920-0279). The data to be used in this study for Wales are available in the  
16 SAIL Databank at Swansea University, Swansea, UK. All proposals to use SAIL data are subject to  
17 review by an independent Information Governance Review Panel (IGRP). Before any data can be  
18 accessed, approval must be given by the IGRP. The IGRP gives careful consideration to each  
19 project to ensure proper and appropriate use of SAIL data. When access has been approved, it is  
20 gained through a privacy-protecting safe haven and remote access system referred to as the SAIL  
21 Gateway. SAIL has established an application process to be followed by anyone who would like to  
22 access data via SAIL.[7] Findings will be presented at conferences, published in peer-reviewed  
23 journals and to the funders and government COVID-19 advisory bodies as appropriate.  
24  
25

26 Strengthening the Reporting of Observational Studies in Epidemiology (STROBE) and Reporting  
27 of studies Conducted using Observational Routinely-collected Data (RECORD) (via the COVID-19  
28 extension) checklists will guide our study findings reporting. The Northern Ireland validation study  
29 proposal is under review by the NITRE for HSC data accessed via Northern Ireland Honest Broker  
30 Service; an Ethics application has been submitted through IRAS.  
31  
32  
33  
34

### 35 **Author's Contributions:**

36 AS conceived this protocol. CR, VH, FK, TC, JHC, BH, CC, RAL and JL provided country  
37 specific information about available data and analysis plans. SK wrote drafts of this protocol. All  
38 authors gave final approval of the version to be published.  
39  
40  
41  
42  
43  
44

### 45 **Acknowledgments**

46 This work will use data provided by patients and collected by a number of organisations. We would  
47 like to acknowledge all patients who shared their information as well as all data providers who  
48 make anonymised data available for research. In particular, Public Health Scotland, Public Health  
49  
50  
51  
52  
53  
54  
55  
56  
57  
58  
59  
60

1  
2 Wales, Public Health England, the NHS, the SAIL databank, and the Office for National Statistics.  
3  
4

5  
6 **Funding:**

7 The validation in England will be funded by a grant from the National Institute for Health Research  
8 following a commission by the Chief Medical Officer for England. In Scotland, EAVE II is funded  
9 by the Medical Research Council [MR/R008345/1] and supported by the Scottish Government. In  
10 Wales, ConCOV is supported by the Medical Research Council [MR/V028367/1].  
11  
12  
13  
14

15  
16 **Competing interests:**

17 AS reports grants from NIHR, grants from MRC, and grants from HRR UK, during the conduct of  
18 the study. JL and RAL report grants from UKRI Medical Research Council, during the conduct of  
19 the study. JHC reports grants from John Fell Oxford University Press Research Fund, grants from  
20 Cancer Research UK (CR-UK) grant number C5255/A18085, through the Cancer Research UK  
21 Oxford Centre, grants from the Oxford Wellcome Institutional Strategic Support Fund  
22 (204826/Z/16/Z), grants from NIHR, during the conduct of the study; personal fees and other from  
23 ClinRisk Ltd, outside the submitted work; and JHC is an unpaid director of QResearch, a not-for-  
24 profit organisation which is a partnership between the University of Oxford and EMIS Health who  
25 supply the QResearch database used for this work. Carol Coupland reports personal fees from  
26 ClinRisk Ltd, outside the submitted work. JHC, AS, and Carol Coupland were members of the  
27 research team involved in the development of the QCOVID risk prediction algorithm. All other  
28 authors report no conflict of interest.  
29  
30  
31  
32  
33  
34  
35  
36  
37  
38  
39

40 **Patient and Public Involvement:**

41 There are no plans for Patient and Public Involvement in this research.  
42  
43  
44

45 **Data sharing:**

46 All code used in these analyses will be made publicly available online e.g. through GitHub.  
47  
48  
49

50 **References:**

51 **1.** Clift AK, Coupland CAC, Keogh RH, Diaz-Ordaz K, Williamson E, Harrison EM, Hayward A,  
52 Hemingway H, Horby P, Mehta N, Bengler J, Khunti K, Spiegelhalter D, Sheikh A, Valabhji J,  
53 Lyons RA, Robson J, Semple MG, Kee F, Johnson P, Jebb S, Williams T, Hippisley-Cox J. Living  
54 risk prediction algorithm (QCOVID) for risk of hospital admission and mortality from coronavirus  
55 19 in adults: national derivation and validation cohort study. *BMJ*. 2020 Oct 20;371:m3731. doi:  
56 10.1136/bmj.m3731. PMID: 33082154; PMCID: PMC7574532.  
57  
58  
59  
60

- 1
- 2 **2.** Townsend, P., Phillimore, P. and Beattie, A. (1988) Health and Deprivation: Inequality and the
- 3 North. Routledge, London. doi: 10.7748/ns.2.17.34.s66. PMID: 27415096.
- 4
- 5 **3.** Qresearch, <https://www.qresearch.org/>
- 6
- 7 **4.** Hippisley-Cox J, Clift AK, Coupland CAC, et al. Protocol for the development and evaluation of
- 8 a tool for predicting risk of short-term adverse outcomes due to COVID-19 in the general UK
- 9 population. *MedRxiv* 2020:2020.06.28.20141986-2020.06.28
- 10
- 11 **5.** [https://www.gov.uk/government/news/new-technology-to-help-identify-those-at-high-risk-from-](https://www.gov.uk/government/news/new-technology-to-help-identify-those-at-high-risk-from-covid-19)
- 12 [covid-19](https://www.gov.uk/government/news/new-technology-to-help-identify-those-at-high-risk-from-covid-19)
- 13
- 14 **6.** EAVE II, The Usher Institute, <https://www.ed.ac.uk/usher/eave-ii>
- 15
- 16 **7.** The Secure Anonymised Information Linkage (SAIL) databank. Available at:
- 17 <https://saildatabank.com>
- 18
- 19 **8.** Lyons J, Akbari A, Torabi F, Davies G, North L, Griffiths R, Bailey R, Hollinghurst J, Fry R,
- 20 Turner S, Thompson D, Rafferty J, Mizen A, Orton C, Ellwood-Thompson S, Au-Yeung L, Cross
- 21 L, Gravenor M, Brophy S, Lucini B, John A, Szakmany T, Davies J, Davies C, Williams C,
- 22 Emmerson C, Cottrell S, Connor T, Taylor C, Pugh R, Diggle PJ, John G, Scourfield S, Hunt J,
- 23 Cunningham AM, Helliwell K, Lyons RA. (2020) Understanding and responding to COVID19 in
- 24 Wales: protocol for a privacy protecting data platform for enhanced epidemiology and evaluation of
- 25 interventions. *BMJ Open* 2020;10:e043010. doi:10.1136/bmjopen-2020-043010
- 26
- 27 **9.** 2011 UK Census, Townsend Deprivation Scores,
- 28 <https://www.statistics.digitalresources.jisc.ac.uk/dataset/2011-uk-townsend-deprivation-scores>
- 29
- 30 **10.** Royston P, Sauerbrei W. A new measure of prognostic separation in survival data. *Stat Med.*
- 31 2004 Mar 15;23(5):723-48. doi: 10.1002/sim.1621. PMID: 14981672.
- 32
- 33
- 34
- 35
- 36
- 37
- 38
- 39
- 40
- 41
- 42
- 43
- 44
- 45
- 46
- 47
- 48
- 49
- 50
- 51
- 52
- 53
- 54
- 55
- 56
- 57
- 58
- 59
- 60





# BMJ Open

## A common protocol for validation of the QCOVID algorithm across the four UK nations

|                                 |                                                                                                                                                                                                                                                                                                                                                                                                                                                                                                                                                                                                                                                                                                                                                                                                                                                                                             |
|---------------------------------|---------------------------------------------------------------------------------------------------------------------------------------------------------------------------------------------------------------------------------------------------------------------------------------------------------------------------------------------------------------------------------------------------------------------------------------------------------------------------------------------------------------------------------------------------------------------------------------------------------------------------------------------------------------------------------------------------------------------------------------------------------------------------------------------------------------------------------------------------------------------------------------------|
| Journal:                        | <i>BMJ Open</i>                                                                                                                                                                                                                                                                                                                                                                                                                                                                                                                                                                                                                                                                                                                                                                                                                                                                             |
| Manuscript ID                   | bmjopen-2021-050994.R2                                                                                                                                                                                                                                                                                                                                                                                                                                                                                                                                                                                                                                                                                                                                                                                                                                                                      |
| Article Type:                   | Protocol                                                                                                                                                                                                                                                                                                                                                                                                                                                                                                                                                                                                                                                                                                                                                                                                                                                                                    |
| Date Submitted by the Author:   | 14-May-2022                                                                                                                                                                                                                                                                                                                                                                                                                                                                                                                                                                                                                                                                                                                                                                                                                                                                                 |
| Complete List of Authors:       | Kerr, Steven; The University of Edinburgh Usher Institute of Population Health Sciences and Informatics,<br>Robertson, Chris; University of Strathclyde, Department of Mathematics and Statistics<br>Nafilyan, Vahe; Office for National Statistics<br>Lyons, Ronan; University of Wales Swansea, Swansea Clinical School<br>Kee, Frank; Queen's University Belfast, UKCRC Centre of Excellence for Public Health (NI)<br>Cardwell, Christopher; Queen's University Belfast, School of Medicine, Dentistry and Biomedical Sciences<br>Coupland, Carol; University of Nottingham, Division of Primary Care<br>Lyons, Jane; Swansea University Medical School<br>Humberstone, Ben; Office for National Statistics<br>Hippisley-Cox, Julia; University of Oxford, Nuffield Department of Primary Care Sciences<br>Sheikh, Aziz; University of Edinburgh, Division of Community Health Sciences |
| <b>Primary Subject Heading</b>: | Epidemiology                                                                                                                                                                                                                                                                                                                                                                                                                                                                                                                                                                                                                                                                                                                                                                                                                                                                                |
| Secondary Subject Heading:      | Infectious diseases, Respiratory medicine                                                                                                                                                                                                                                                                                                                                                                                                                                                                                                                                                                                                                                                                                                                                                                                                                                                   |
| Keywords:                       | COVID-19, Epidemiology < INFECTIOUS DISEASES, Public health < INFECTIOUS DISEASES                                                                                                                                                                                                                                                                                                                                                                                                                                                                                                                                                                                                                                                                                                                                                                                                           |
|                                 |                                                                                                                                                                                                                                                                                                                                                                                                                                                                                                                                                                                                                                                                                                                                                                                                                                                                                             |

SCHOLARONE™  
Manuscripts



# A common protocol for validation of the QCOVID algorithm across the four UK nations

Steven Kerr, stevenkerr2@gmail.com (corresponding author) [1]

Chris Robertson [2,3]

Vahe Nafilyan [4]

Ronan A Lyons [5]

Frank Kee [6]

Chris Cardwell [6]

Carol Coupland [7]

Jane Lyons [5]

Ben Humberstone [4]

Julie Hippisley-Cox [8]

Aziz Sheikh [1]

[1] Usher Institute, The University of Edinburgh, NINE Edinburgh BioQuarter, Edinburgh, UK, EH16 4UX.

[2] University of Strathclyde, Glasgow, UK.

[3] Public Health Scotland, UK

[4] Office for National Statistics, UK.

[5] Population Data Science, Swansea University Medical School, Swansea, UK.

[6] Queen's University Belfast, Belfast, UK.

[7] University of Nottingham, Nottingham, UK.

[8] University of Oxford, Oxford, UK.

**Keywords:** Covid-19, Coronavirus, QCOVID, Epidemiology, Public Health.

**Word count:** 1,653

## ABSTRACT

### Introduction:

The QCOVID algorithm is a risk prediction tool for infection and subsequent hospitalisation/death due to SARS-Cov-2. At the time of writing, it is being used in important policymaking decisions by the UK and devolved governments for combatting the Covid-19 pandemic, including deliberations on shielding and vaccine prioritisation. There are four statistical validation exercises currently planned for the QCOVID algorithm, using data pertaining to England, Northern Ireland, Scotland and Wales respectively. This paper presents a common procedure for conducting and reporting on validation exercises for the QCOVID algorithm.

### Methods and Analysis:

We will use open, retrospective cohort studies to assess the performance of the QCOVID risk prediction tool in each of the four UK nations. Linked datasets comprising of primary and secondary care records, virological testing data and death registrations will be assembled in trusted research environments in England, Scotland, Northern Ireland and Wales. We will seek to have population level coverage as far as possible within each nation. The following performance metrics will be calculated by strata: Harrell's C, Brier score,  $R^2$  and Royston's D.

### Ethics and dissemination:

Approvals have been obtained from relevant ethics bodies in each UK nation. Findings will be made available to national policymakers, presented at conferences and published in peer reviewed journal

### Strengths and limitations of this study:

- We will use national level data within each UK nation
- There are potential issues with missing data and differences in the way data is recorded in each country.
- We will evaluate the performance of the algorithm according to several relevant metrics.



## INTRODUCTION:

The QCOVID algorithm [1] has been developed to help identify adults at high risk of being hospitalised or dying following infection with SARS-Cov-2 (Severe acute respiratory syndrome coronavirus 2). The algorithm takes as input a total of 40 variables including age, sex, ethnicity, Townsend deprivation score [2] and housing category, as well as clinical information including body mass index (BMI) and 33 variables related to medical conditions and treatments. It outputs the predicted probability that an individual will be infected with SARS-Cov-2 and then hospitalised, and the predicted probability that an individual will be infected with SARS-Cov-2 and then die, over a 90 day period. The algorithm was trained using information from the QResearch database [3], which as of April 2020 contained routinely collected data from 1205 General Practices across England, covering 10.5 million patients. The initial training dataset comprised of a cohort of 6.08 million individuals tracked from the 24 January 2020 to 30 April 2020, and was validated on a subset of 2.17 million individuals tracked from 1 May 2020 to 30 June 2020. The research protocol for the development of the QCOVID algorithm can be found in [4].

The QCOVID algorithm was commissioned by the Chief Medical Officer for England on behalf of the UK government. The algorithm has been used to inform UK and devolved government policy on combatting the SARS-Cov-2 pandemic, including guidance on social-distancing and shielding measures, as well vaccine prioritisation. [5] It is therefore of great importance to validate the predictions of the algorithm in sub-populations of the UK that were not in the initial training set, but will potentially be subject to those policies.

At the time of writing, there are validation exercises planned in Scotland, Northern Ireland and Wales, and a validation exercise underway in England. Validation work was considered urgent and has been expedited in order to support national decision making. In order to facilitate useful comparison of the results of the separate validation exercises, it is necessary to establish a consistent set of procedures. The purpose of this paper is to explicate a common methodology for the validation of the QCOVID algorithm across the four nations of the UK.

## METHODS AND ANALYSIS:

### Study design:

1  
2 Open, retrospective cohort study designs will be employed, making use of routinely collected data  
3 from General Practices for clinical and demographic information, as well as linked datasets on  
4 hospital admissions, reverse-transcription polymerase chain reaction (RT-PCR) testing for Covid-  
5 19, and registered deaths. We will aim to have national coverage as far as is possible within each of  
6 the four nations of the UK.  
7  
8  
9

## 10 11 12 **Data Sources:**

13  
14 Box 1 contains a brief summary of the main datasets that will be used in the validation exercise for  
15 each nation  
16

### 17 **Box 1: Main datasets to be used**

18  
19  
20  
21 **England:** Office for National Statistics (ONS) Public Health Linked Data Asset. This dataset is  
22 based on the 2011 Census in England covering 40.1 million people, linked at individual level  
23 using the NHS number to mortality records, Hospital Episode Statistics (HES) and the General  
24 Practice Extraction Service (GPES) data for pandemic planning and research. The data covers  
25 80% of the population of England aged 19 and over.  
26  
27

28  
29  
30 **Northern Ireland:** National Health Application and Infrastructure Services (NHAIS) will be used  
31 for demographic information. The Patient Administration System (PAS) will be used for data on  
32 hospital admissions. Death data will be drawn from the Registrar General, and identified as  
33 Covid-19 related through the official Northern Ireland Statistics and Research Agency (NISRA)  
34 dashboard. The General Practice Information Platform (GPIP) will bring together GP records  
35 from practices across Northern Ireland into a single dataset for use in the validation. As this is not  
36 held in the Honest Broker Service, a separate request to its governance board is being made. The  
37 Electronic Prescribing Database (EPD) will be used to access information on prescriptions.  
38  
39

40  
41  
42 **Scotland:** EAVE II dataset [6]. Contains primary health care records for 5.4 million people covering  
43 99% of the population of Scotland, linked with secondary care data from Scottish Morbidity  
44 Record (SMR), Covid-19 test results from Electronic Communication of Surveillance Scotland  
45 (ECOSS), and mortality data from National Records Scotland.  
46  
47

48  
49  
50  
51 **Wales:** Secure Anonymised Information Linkage (SAIL system) [7]. This will utilise the Controlling  
52 Covid (ConCOV) platform linking records on 3.2 million people from the NHS population spine  
53 with hospital (Patient Episode Database for Wales), Welsh Longitudinal GP record (WLGP),  
54 Covid-19 test results from the Laboratory Information Management System (LIMS), and  
55 mortality and 2011 Census data from the Office for National Statistics (ONS) [8]  
56  
57  
58  
59  
60

**Selection criteria:**

Any individual in the relevant linked dataset between the ages of 19 and 100 will be included.

Individuals who had an event (hospitalisation or death) in the first period (24 January 2020 – 30

April 2020) will be excluded from any analysis in the second period (1 May 2020 – 30 June 2020).

These time periods were chosen to mirror the time periods in the original QCOVID paper. After the vaccination programme started in the UK on 8 December 2020, work had already begun on QCOVID 2&3, which will take into account vaccination status. Future validation work will focus on QCOVID 2&3 for more recent time periods.

**Exposure and Outcomes:**

Table 1 and 2 list all exposure and outcomes variables respectively for the QCOVID algorithm, along with a description, variable type (e.g. integer, real, categorical) and possible values.

*Table 1: Exposure variables in QCOVID algorithm.*

| <b>Variable:</b>    | <b>Description/Question:</b>                                      | <b>Value:</b>                                                                                                                      |
|---------------------|-------------------------------------------------------------------|------------------------------------------------------------------------------------------------------------------------------------|
| <b>Demographic:</b> |                                                                   |                                                                                                                                    |
| age                 | Age in years                                                      | Integer: 19-100                                                                                                                    |
| sex                 | Biological sex at birth                                           | Categorical: female, male                                                                                                          |
| town                | Townsend Deprivation Score                                        | Real number                                                                                                                        |
| ethnicity           | Ethnicity                                                         | Categorical:<br>White, Indian, Pakistani,<br>Bangladeshi, Other Asian,<br>Caribbean, Black African,<br>Chinese, other ethnic group |
| homecat             | What is your housing category - care home or homeless or neither? | Categorical:<br>neither, care home,<br>homeless                                                                                    |

|                  |                                      |                      |
|------------------|--------------------------------------|----------------------|
| <b>Clinical:</b> |                                      |                      |
| bmi              | Body Mass Index (kg/m <sup>2</sup> ) | Positive real number |

|               |                                                                                                                             |                                                                                                                                                                                                                   |
|---------------|-----------------------------------------------------------------------------------------------------------------------------|-------------------------------------------------------------------------------------------------------------------------------------------------------------------------------------------------------------------|
| chemocat      | Have you had chemotherapy in the last 12 months?                                                                            | Categorical:<br>none, group A, group B,<br>group C                                                                                                                                                                |
| learncat      | Do you have a learning disability or Down's Syndrome?                                                                       | Categorical:<br>learning disability, Down<br>syndrome                                                                                                                                                             |
| renalcat      | Chronic Kidney Disease (CKD) stage                                                                                          | Categorical:<br>No serious kidney disease,<br>CKD stage 3,<br>CKD stage 4,<br>CKD stage 5 without<br>dialysis or transplant,<br>CKD stage 5 with dialysis<br>in last 12 months,<br>CKD stage 5 with<br>transplant |
| diabetescat   | Do you have diabetes?                                                                                                       | Categorical:<br>none, type 1, type 2                                                                                                                                                                              |
| b2_82         | Have you been prescribed immunosuppressants four or more times in the previous 6 months?                                    | Categorical: yes, no                                                                                                                                                                                              |
| b2_leukolaba  | Have you been prescribed anti-leukotriene or long acting beta2-agonists (LABA) four or more times in the previous 6 months? | Categorical: yes, no                                                                                                                                                                                              |
| b2_prednisone | Have you been prescribed oral prednisolone containing preparations prescribed four or more times in the previous 6 months?  | Categorical: yes, no                                                                                                                                                                                              |
| b_AF          | Do you have atrial fibrillation?                                                                                            | Categorical: yes, no                                                                                                                                                                                              |
| b_CCF         | Do you have heart failure?                                                                                                  | Categorical: yes, no                                                                                                                                                                                              |
| b_asthma      | Do you have asthma?                                                                                                         | Categorical: yes, no                                                                                                                                                                                              |

1  
2  
3  
4  
5  
6  
7  
8  
9  
10  
11  
12  
13  
14  
15  
16  
17  
18  
19  
20  
21  
22  
23  
24  
25  
26  
27  
28  
29  
30  
31  
32  
33  
34  
35  
36  
37  
38  
39  
40  
41  
42  
43  
44  
45  
46  
47  
48  
49  
50  
51  
52  
53  
54  
55  
56  
57  
58  
59  
60

|                  |                                                                                                                                                    |                      |
|------------------|----------------------------------------------------------------------------------------------------------------------------------------------------|----------------------|
| b_bloodcancer    | Have you a cancer of the blood or bone marrow such as leukaemia, myelodysplastic syndromes, lymphoma or myeloma and are at any stage of treatment? | Categorical: yes, no |
| b_cerebralpalsay | Do you have cerebral palsy?                                                                                                                        | Categorical: yes, no |
| b_chd            | Do you have coronary heart disease?                                                                                                                | Categorical: yes, no |
| b_cirrhosis      | Do you have cirrhosis of the liver?                                                                                                                | Categorical: yes, no |
| b_congenheart    | Do you have congenital heart disease or have you had surgery for it in the past?                                                                   | Categorical: yes, no |
| b_copd           | Do you have chronic obstructive pulmonary disease (COPD)?                                                                                          | Categorical: yes, no |
| b_dementia       | Do you have dementia?                                                                                                                              | Categorical: yes, no |
| b_epilepsy       | Do you have epilepsy?                                                                                                                              | Categorical: yes, no |
| b_fracture4      | Have you had a prior fracture of hip, wrist, spine or humerus?                                                                                     | Categorical: yes, no |
| b_neurorare      | Do you have motor neurone disease, multiple sclerosis, myasthenia, or Huntingtons's Chorea?                                                        | Categorical: yes, no |
| b_parkinsons     | Do you have Parkinson's disease?                                                                                                                   | Categorical: yes, no |
| b_pulmhyper      | Do you have pulmonary hypertension or pulmonary fibrosis?                                                                                          | Categorical: yes, no |
| b_pulmrare       | Do you have cystic fibrosis or bronchiectasis or alveolitis?                                                                                       | Categorical: yes, no |
| b_pvd            | Do you have peripheral vascular disease?                                                                                                           | Categorical: yes, no |
| b_ra_sle         | Do you have rheumatoid arthritis or SLE?                                                                                                           | Categorical: yes, no |
| b_respcancer     | Do you have lung or oral cancer?                                                                                                                   | Categorical: yes, no |

|                     |                                                                                                  |                      |
|---------------------|--------------------------------------------------------------------------------------------------|----------------------|
| b_semi              | Do you have severe mental illness?                                                               | Categorical: yes, no |
| b_sicklecelldisease | Do you have sickle cell disease or severe combined immune deficiency syndromes?                  | Categorical: yes, no |
| b_stroke            | Have you had a stroke or TIA?                                                                    | Categorical: yes, no |
| b_vte               | Have you had a thrombosis or pulmonary embolus?                                                  | Categorical: yes, no |
| p_marrow6           | Have you had a bone marrow or stem cell transplant in the last 6 months?                         | Categorical: yes, no |
| p_radio6            | Have you had radiotherapy in the last 6 months?                                                  | Categorical: yes, no |
| p_solidtransplant   | Have you had a solid organ transplant (lung, liver, stomach, pancreas, spleen, heart or thymus)? | Categorical: yes, no |

Table 2: Outcomes variables in QCOVID algorithm.

| Variable:                        | Description/Question:                                                                                                                     | Value:            |
|----------------------------------|-------------------------------------------------------------------------------------------------------------------------------------------|-------------------|
| Time to Covid-19 hospitalisation | Time to hospitalisation with RT-PCR confirmed Covid-19 infection in the cohort period in days.                                            | Real number: 0-91 |
| Time to Covid-19 death           | Time to death with Covid-19 confirmed or suspected on their death certificate, or confirmed by RT-PCR test, in the cohort period in days. | Real number: 0-91 |

Whenever available, all variables will be taken as the most recent recorded value in the relevant dataset at the date of entry into the cohort. The Townsend Deprivation Score (TDS) will be

1  
2 determined by matching available residential location information with output area and the  
3 corresponding TDS from the 2011 UK census [9]. Categories for the variable chemocat will be  
4 determined using the lookup table in the supplemental materials.  
5  
6  
7

### 8 **Data cleaning:**

9 The following procedures will be used for data cleaning:

- 10 • **diabetes\_cat:** If the most recent entry has both type 1 and types 2 recorded, diabetes\_cat  
11 will be set to type 2.
- 12 • **BMI:** The most recently recorded patient BMI within the last 5 years. If the most recently  
13 recorded BMI is from more than 5 years ago at the search date, BMI will be set to missing  
14 value. Implausible values for BMI (<12 or >70) will be set to missing value.
- 15 • **learncat:** If a patient is recorded has having both learning disability and Down's syndrome,  
16 learncat will be set to Down's syndrome.  
17  
18  
19  
20  
21  
22  
23  
24  
25

### 26 **Missing data:**

27 For comorbidities and medication use and treatments, missing values will be taken to mean absence  
28 of that factor. Modal substitution will be considered for missing values for ethnicity. For any other  
29 missing values of predictor variables, a single imputation will be considered. Outcome variables  
30 will not be imputed, and nor will they be included as predictors in the imputation. The following  
31 methods may be considered for use in the imputation: predictive mean matching, least squares,  
32 logistic and multinomial models, imputation by chained equations.  
33  
34  
35  
36  
37  
38  
39  
40  
41  
42  
43  
44

### 45 **Statistical Analysis:**

46 Each validation exercise will report a table of cohort characteristics, following Table 2 in [1]. The  
47 main performance metrics that will be calculated are  $R^2$  [9], Harrell's C, Royston's D [10] and the  
48 Brier score. Different stratifications for these statistics will be considered, including by age, sex and  
49 time period. 95% confidence intervals will be reported for  $R^2$ , Harrell's C and Royston's D. Graphs  
50 of observed and predicted probability of hospital admission and death by vigintile for stratified  
51 subgroups will be reported, following [1].  
52  
53  
54  
55  
56  
57  
58

### 59 **Sample Size:**

1  
2 A preliminary sample size calculation can be done using figures from the original paper [1]. Using  
3 the estimated standard deviation of Harrell's C for females in the first time period and assuming  
4 Harrell's C is asymptotically normally distributed implies that a sample size of approximately 5,714  
5 would be sufficient to correctly reject a null hypothesis of  $C=0.5$  at significance level 0.05 with  
6 probability 80% given a true value of  $C=0.8$ . Repeating this calculation for other population  
7 subgroups and time periods yields results of a similar magnitude. The samples sizes in the planned  
8 studies will be on the order of hundreds of thousands or millions.  
9  
10  
11  
12  
13  
14

### 15 **Ethics, reporting and dissemination**

16 The ethics approval for the development and validation of QCOVID in England was granted by the  
17 East Midlands-Derby Research Ethics Committee [reference 18/EM/0400]. For Scotland, approvals  
18 have been obtained by the National Research Ethics Service Committee (REC), South East Scotland  
19 02 (REC number: 12/SS/0201) and the Public Benefit and Privacy Panel for Health and Social Care  
20 02 (REC number: 1920-0279). The data to be used in this study for Wales are available in the  
21 SAIL Databank at Swansea University, Swansea, UK. All proposals to use SAIL data are subject to  
22 review by an independent Information Governance Review Panel (IGRP). Before any data can be  
23 accessed, approval must be given by the IGRP. The IGRP gives careful consideration to each  
24 project to ensure proper and appropriate use of SAIL data. When access has been approved, it is  
25 gained through a privacy-protecting safe haven and remote access system referred to as the SAIL  
26 Gateway. SAIL has established an application process to be followed by anyone who would like to  
27 access data via SAIL.[7] Findings will be presented at conferences, published in peer-reviewed  
28 journals and to the funders and government COVID-19 advisory bodies as appropriate.  
29 Strengthening the Reporting of Observational Studies in Epidemiology (STROBE) and Reporting  
30 of studies Conducted using Observational Routinely-collected Data (RECORD) (via the COVID-19  
31 extension) checklists will guide our study findings reporting. The Northern Ireland validation study  
32 proposal is under review by the NITRE for HSC data accessed via Northern Ireland Honest Broker  
33 Service; an Ethics application has been submitted through IRAS.  
34  
35  
36  
37  
38  
39  
40  
41  
42  
43  
44  
45  
46  
47  
48  
49

### 50 **Author's Contributions:**

51 AS conceived this protocol. CR, VH, FK, TC, JHC, BH, CC, RAL and JL provided country  
52 specific information about available data and analysis plans. SK wrote drafts of this protocol. All  
53 authors gave final approval of the version to be published.  
54  
55  
56  
57  
58

### 59 **Acknowledgments**



1  
2 This work will use data provided by patients and collected by a number of organisations. We would  
3 like to acknowledge all patients who shared their information as well as all data providers who  
4 make anonymised data available for research. In particular, Public Health Scotland, Public Health  
5 Wales, Public Health England, the NHS, the SAIL databank, and the Office for National Statistics.  
6  
7  
8  
9

### 10 **Funding:**

11  
12 The validation in England will be funded by a grant from the National Institute for Health Research  
13 following a commission by the Chief Medical Officer for England. In Scotland, EAVE II is funded  
14 by the Medical Research Council [MR/R008345/1] and supported by the Scottish Government. In  
15 Wales, ConCOV is supported by the Medical Research Council [MR/V028367/1].  
16  
17  
18  
19

### 20 **Competing interests:**

21  
22 AS reports grants from NIHR, grants from MRC, and grants from HRR UK, during the conduct of  
23 the study. JL and RAL report grants from UKRI Medical Research Council, during the conduct of  
24 the study. JHC reports grants from John Fell Oxford University Press Research Fund, grants from  
25 Cancer Research UK (CR-UK) grant number C5255/A18085, through the Cancer Research UK  
26 Oxford Centre, grants from the Oxford Wellcome Institutional Strategic Support Fund  
27 (204826/Z/16/Z), grants from NIHR, during the conduct of the study; personal fees and other from  
28 ClinRisk Ltd, outside the submitted work; and JHC is an unpaid director of QResearch, a not-for-  
29 profit organisation which is a partnership between the University of Oxford and EMIS Health who  
30 supply the QResearch database used for this work. Carol Coupland reports personal fees from  
31 ClinRisk Ltd, outside the submitted work. JHC, AS, and Carol Coupland were members of the  
32 research team involved in the development of the QCOVID risk prediction algorithm. All other  
33 authors report no conflict of interest.  
34  
35  
36  
37  
38  
39  
40  
41  
42  
43  
44

### 45 **Patient and Public Involvement:**

46 There are no plans for Patient and Public Involvement in this research.  
47  
48  
49

### 50 **Data sharing:**

51 All code used in these analyses will be made publicly available online e.g. through GitHub.  
52  
53  
54

### 55 **References:**

56  
57 1. Clift AK, Coupland CAC, Keogh RH, Diaz-Ordaz K, Williamson E, Harrison EM, Hayward A,  
58 Hemingway H, Horby P, Mehta N, Benger J, Khunti K, Spiegelhalter D, Sheikh A, Valabhji J,  
59 Lyons RA, Robson J, Semple MG, Kee F, Johnson P, Jebb S, Williams T, Hippisley-Cox J. Living  
60

- 1  
2 risk prediction algorithm (QCOVID) for risk of hospital admission and mortality from coronavirus  
3  
4 19 in adults: national derivation and validation cohort study. *BMJ*. 2020 Oct 20;371:m3731. doi:  
5 10.1136/bmj.m3731. PMID: 33082154; PMCID: PMC7574532.  
6  
7 **2.** Townsend, P., Phillimore, P. and Beattie, A. (1988) *Health and Deprivation: Inequality and the*  
8 *North*. Routledge, London. doi: 10.7748/ns.2.17.34.s66. PMID: 27415096.  
9  
10 **3.** Qresearch, <https://www.qresearch.org/>  
11  
12 **4.** Hippisley-Cox J, Clift AK, Coupland CAC, et al. Protocol for the development and evaluation of  
13 a tool for predicting risk of short-term adverse outcomes due to COVID-19 in the general UK  
14 population. *MedRxiv* 2020:2020.06.28.20141986-2020.06.28  
15  
16 **5.** [https://www.gov.uk/government/news/new-technology-to-help-identify-those-at-high-risk-from-](https://www.gov.uk/government/news/new-technology-to-help-identify-those-at-high-risk-from-covid-19)  
17 [covid-19](https://www.gov.uk/government/news/new-technology-to-help-identify-those-at-high-risk-from-covid-19)  
18  
19 **6.** EAVE II, The Usher Institute, <https://www.ed.ac.uk/usher/eave-ii>  
20  
21 **7.** The Secure Anonymised Information Linkage (SAIL) databank. Available at:  
22 <https://saildatabank.com>  
23  
24 **8.** Lyons J, Akbari A, Torabi F, Davies G, North L, Griffiths R, Bailey R, Hollinghurst J, Fry R,  
25 Turner S, Thompson D, Rafferty J, Mizen A, Orton C, Ellwood-Thompson S, Au-Yeung L, Cross  
26 L, Gravenor M, Brophy S, Lucini B, John A, Szakmany T, Davies J, Davies C, Williams C,  
27 Emmerson C, Cottrell S, Connor T, Taylor C, Pugh R, Diggle PJ, John G, Scourfield S, Hunt J,  
28 Cunningham AM, Helliwell K, Lyons RA. (2020) Understanding and responding to COVID19 in  
29 Wales: protocol for a privacy protecting data platform for enhanced epidemiology and evaluation of  
30 interventions. *BMJ Open* 2020;10:e043010. doi:10.1136/bmjopen-2020-043010  
31  
32 **9.** 2011 UK Census, Townsend Deprivation Scores,  
33 <https://www.statistics.digitalresources.jisc.ac.uk/dataset/2011-uk-townsend-deprivation-scores>  
34  
35 **10.** Royston P, Sauerbrei W. A new measure of prognostic separation in survival data. *Stat Med*.  
36 2004 Mar 15;23(5):723-48. doi: 10.1002/sim.1621. PMID: 14981672.  
37  
38  
39  
40  
41  
42  
43  
44  
45  
46  
47  
48  
49  
50  
51  
52  
53  
54  
55  
56  
57  
58  
59  
60



|    | Group | Final classification | map   |
|----|-------|----------------------|-------|
| 1  |       | Group A              | 1 & 2 |
| 2  |       | Group B              | 3 & 4 |
| 3  |       | Group C              | 5     |
| 4  |       |                      |       |
| 5  |       |                      |       |
| 6  |       |                      |       |
| 7  |       |                      |       |
| 8  |       |                      |       |
| 9  |       |                      |       |
| 10 |       |                      |       |
| 11 |       |                      |       |
| 12 |       |                      |       |
| 13 |       |                      |       |
| 14 |       |                      |       |
| 15 |       |                      |       |
| 16 |       |                      |       |
| 17 |       |                      |       |
| 18 |       |                      |       |
| 19 |       |                      |       |
| 20 |       |                      |       |
| 21 |       |                      |       |
| 22 |       |                      |       |
| 23 |       |                      |       |
| 24 |       |                      |       |
| 25 |       |                      |       |
| 26 |       |                      |       |
| 27 |       |                      |       |
| 28 |       |                      |       |
| 29 |       |                      |       |
| 30 |       |                      |       |
| 31 |       |                      |       |
| 32 |       |                      |       |
| 33 |       |                      |       |
| 34 |       |                      |       |
| 35 |       |                      |       |
| 36 |       |                      |       |
| 37 |       |                      |       |
| 38 |       |                      |       |
| 39 |       |                      |       |
| 40 |       |                      |       |
| 41 |       |                      |       |
| 42 |       |                      |       |
| 43 |       |                      |       |
| 44 |       |                      |       |
| 45 |       |                      |       |
| 46 |       |                      |       |
| 47 |       |                      |       |
| 48 |       |                      |       |
| 49 |       |                      |       |
| 50 |       |                      |       |
| 51 |       |                      |       |
| 52 |       |                      |       |
| 53 |       |                      |       |
| 54 |       |                      |       |
| 55 |       |                      |       |
| 56 |       |                      |       |
| 57 |       |                      |       |
| 58 |       |                      |       |
| 59 |       |                      |       |
| 60 |       |                      |       |
